# Supplementary material for: High-frequency Contactless Sensor for the Detection of Heparin-Induced Thrombocytopenia Antibodies via Platelet Aggregation
Source: Int J Mol Sci. 2022 Nov 19;23(22):14395. doi: 10.3390/ijms232214395 (PMC9694871; doi:10.3390/ijms232214395)
Supplement: Supplementary file 1 [file ijms-23-14395-s001.zip › ijms-1964456-supplementary.pdf]

## Supplementary Information

### High-frequency Contactless Sensor for the Detection of Heparin-Induced Thrombocytopenia Antibodies *via* Platelet Aggregation

Nida Zaman Khan,<sup>1,2</sup> Daniel Martin,<sup>1</sup> Uwe Pliquet,<sup>1,2</sup> Yahor Zaikou,<sup>1</sup> Nacke Thomas,<sup>1</sup>  
Doris Heinrich,<sup>1,2</sup> J. Michael Köhler,<sup>2</sup> and Thi-Huong Nguyen<sup>1,2\*</sup>

<sup>1</sup>*Institute for Bioprocessing and Analytical Measurement Techniques (iba),  
37308 Heiligenstadt, Germany*

<sup>2</sup>*Institute for Chemistry and Biotechnology, Faculty of Mathematics and Natural Sciences,  
Technische Universität Ilmenau, 98694 Ilmenau, Germany*

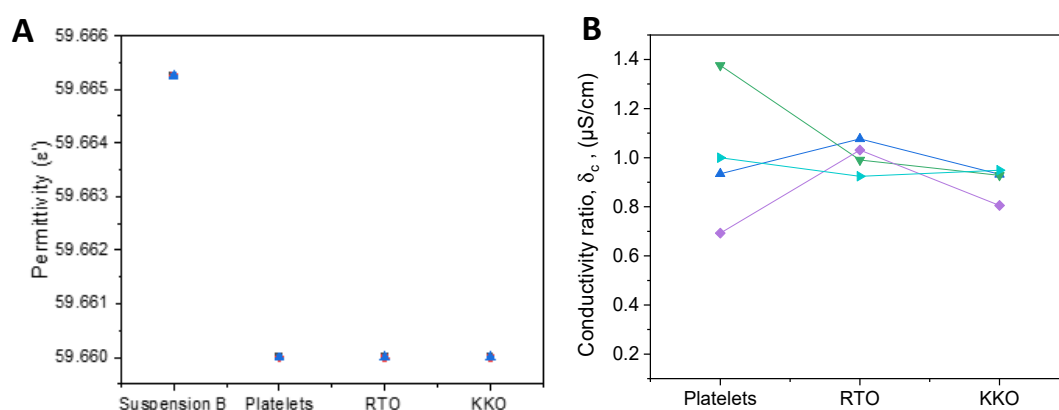

**Figure S1. (A)** Platelet samples show lower permittivity compared to suspension buffer. No different permittivity was observed among platelet alone, and platelet with the addition of RTO or KKO antibodies. **(B)** No significant change in the ratio of conductivity  $\delta_c$  was seen due to the effect of platelet concentration, platelet age, and bubble-effect.
